# Supplementary material for: Associative nitrogen fixation in nodules of the conifer Lepidothamnus fonkii (Podocarpaceae) inhabiting ombrotrophic bogs in southern Patagonia
Source: PubMed Central journal article supplement (PMC5157042; doi:10.1038/srep39072), 2016-12-15
Supplement: srep39072-s1.pdf [file srep39072-s1.pdf]

## Supporting Information

**Article title: Associative nitrogen fixation in nodules of the conifer *Lepidothamnus fonkii* (*Podocarpaceae*) inhabiting ombrotrophic bogs in southern Patagonia**

Authors: Werner Borken, Marcus A. Horn, Stefan Geimer, Nelson A. Bahamonde Aguilar, Klaus-Holger Knorr

The following Supporting Information is available for this article:

**Fig. S1** Relative abundances of 16S rRNA derived, classified operational taxonomic units (OTUs) in amplicon Illumina libraries retrieved from live roots of *Lepidothamnus fonkii* and peat material.

**Table S1** Peat characteristics of the sampling sites Seno Skyring (SKY) and Seno Obstruccion (OBS)

**Table S2**  $^{15}\text{N}$  natural abundance of plant and peat reference material used for  $^{15}\text{N}$  uptake calculations after conversion into  $^{15}\text{N}$  atom %.

**Table S3** Diversity of *nifH* genes and transcripts recovered from live roots of *Lepidothamnus fonkii* and peat material.

**Table S4** Relative abundance of *nifH* gene and transcript (mRNA) defined OTUs retrieved from live roots of *Lepidothamnus fonkii* and peat material.

**Fig. S1** Relative abundances of 16S rRNA derived, classified operational taxonomic units (OTUs) in amplicon Illumina libraries retrieved from live roots of *Lepidothamnus fonkii* and peat material. Approximately 13.000 quality-filtered reads were obtained per amplicon library. OTUs with a relative abundance of > 1% in one of the libraries are presented. *Beijerinckiaceae* include nitrogen fixing genera and are associated with *L. fonkii* roots rather than with peat material.

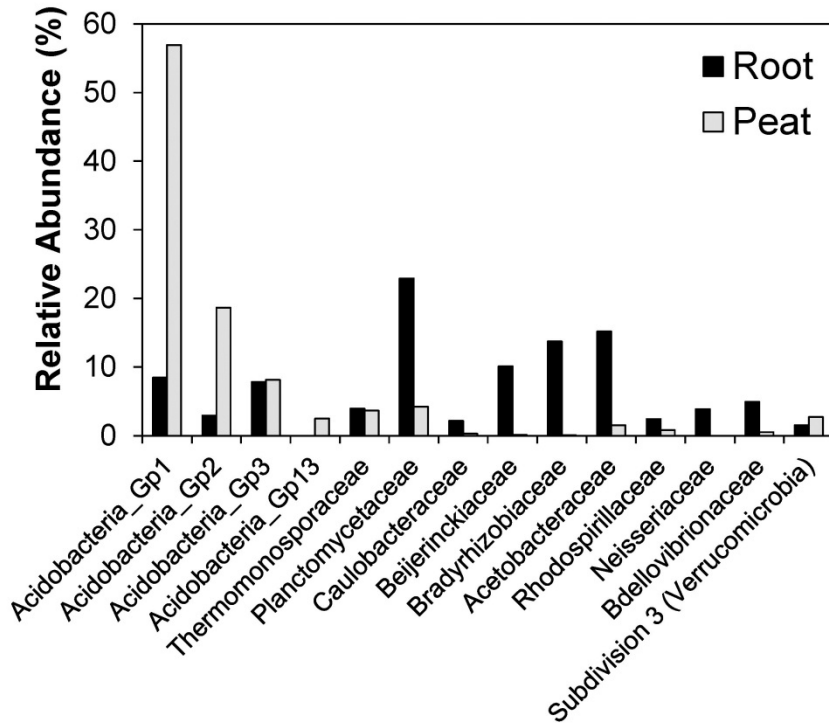

**Table S1** Peat characteristics of the sampling sites Seno Skyring (SKY) and Seno Obstruccion (OBS): Content of nitrogen, molar ratios of carbon to nitrogen and  $^{15}\text{N}$  isotopic signatures of bulk peat for the upper 80 cm.

| Depth (cm) | OBS           |                 |                                   | SKY           |                 |                                   |
|------------|---------------|-----------------|-----------------------------------|---------------|-----------------|-----------------------------------|
|            | N (%) by mass | Molar C/N ratio | $\delta^{15}\text{N}$ vs. air (‰) | N (%) by mass | Molar C/N ratio | $\delta^{15}\text{N}$ vs. air (‰) |
| 0 - 10     | 0.69          | 93.9            | -5.3                              | 0.72          | 68.4            | -4.4                              |
| 10 - 20    | 0.70          | 92.0            | -2.8                              | 1.74          | 33.6            | 0.3                               |
| 20 - 30    | 1.44          | 45.6            | 0.7                               | 2.03          | 27.9            | 2.5                               |
| 30 - 40    | 1.67          | 38.0            | 1.7                               | 2.16          | 27.0            | 2.8                               |
| 40 - 50    | 1.66          | 36.2            | 3.9                               | 1.85          | 30.1            | 2.4                               |
| 50 - 60    | 1.96          | 32.3            | 3.6                               | 0.89          | 35.4            | 1.3                               |
| 60 - 70    | 1.36          | 44.8            | 2.1                               | 1.14          | 42.0            | 0.4                               |
| 70 - 80    | 1.72          | 37.7            | 1.0                               | 1.31          | 46.0            | 0.3                               |

**Table S2**  $^{15}\text{N}$  natural abundance of plant and peat reference material used for  $^{15}\text{N}$  uptake calculations after conversion into  $^{15}\text{N}$  atom %. All reference plants and peat samples were obtained in close vicinity and similar microforms as of samples used for incubations. Peat samples were obtained as a representative sample from 0-10 cm depth.

|                  | OBS                       |   | SKY                       |   |
|------------------|---------------------------|---|---------------------------|---|
|                  | $\delta^{15}\text{N}$ (‰) | n | $\delta^{15}\text{N}$ (‰) | n |
| <i>L. fonkii</i> |                           |   |                           |   |
| Leafs            | $-8.12 \pm 0.83$          | 3 | $-6.99 \pm 0.77$          | 3 |
| Stems            | $-2.96 \pm 1.44$          | 3 | $-1.04 \pm 0.75$          | 3 |
| Roots            | $-4.56 \pm 0.95$          | 3 | $-2.93 \pm 0.65$          | 3 |
| Peat             |                           |   |                           |   |
| Root free bulk   | $-1.69 \pm 0.21$          | 6 | $+0.22 \pm 1.71$          | 6 |
| <i>T. repens</i> |                           |   |                           |   |
| Roots            | $-0.73 \pm 0.45$          | 3 |                           |   |

**Table S3** Diversity of *nifH* genes and transcripts recovered from live roots of *Lepidothamnus* sp. and peat material.

| Sample      | No. of sequences | Good's coverage (%) <sup>*</sup> | No. of OTUs observed | No. of OTUs estimated <sup>†</sup> | $H$ <sup>‡</sup> | $E$ <sup>§</sup> |
|-------------|------------------|----------------------------------|----------------------|------------------------------------|------------------|------------------|
| Root        |                  |                                  |                      |                                    |                  |                  |
| Genes       | 20               | 86                               | 7                    | 8                                  | 1.1              | 0.7              |
| Transcripts | 76               | 99                               | 3                    | 3                                  | 0.3              | 0.3              |
| Peat        |                  |                                  |                      |                                    |                  |                  |
| Genes       | 90               | 93                               | 18                   | 26                                 | 1.5              | 0.6              |
| Transcripts | 78               | 94                               | 19                   | 20                                 | 1.4              | 0.6              |

<sup>\*</sup>Percent library coverage  $C = (1 - n_s/n_t) * 100$  ( $n_s$  = OTUs that occur only once,  $n_t$  = total number of sequences)

<sup>†</sup>Chao1 richness estimate with upper and lower 95% confidence intervals given in parentheses.

<sup>‡</sup>Shannon diversity index.

<sup>§</sup>Species Evenness.

**Table S4.** Diversity of *nifH* genes and transcripts recovered from live roots of *Lepidothamnus fonkii* sp. and peat material.

| Phylogenetic affiliation of close relative (taxonomically validated) | OTU | NifH of close taxonomically validated relative (Accession number)    | $I^*$ (%) | NifH with highest $I$ (Accession number)                             | $I$ (%) | Relative abundance (%) |      |       |      |  |
|----------------------------------------------------------------------|-----|----------------------------------------------------------------------|-----------|----------------------------------------------------------------------|---------|------------------------|------|-------|------|--|
|                                                                      |     |                                                                      |           |                                                                      |         | Root                   |      | Peat  |      |  |
|                                                                      |     |                                                                      |           |                                                                      |         | Genes                  | mRNA | Genes | mRNA |  |
| <i>Proteobacteria</i>                                                |     |                                                                      |           |                                                                      |         |                        |      |       |      |  |
| <i>Alphaproteobacteria</i>                                           |     |                                                                      |           |                                                                      |         |                        |      |       |      |  |
| <i>Rhizobiales</i>                                                   |     |                                                                      |           |                                                                      |         |                        |      |       |      |  |
| <i>Biejerinckiaceae</i>                                              | 3   | <i>Beijerinckia indica</i> subsp. <i>indica</i> ATCC 9039 (AJ563938) | 97        | <i>Beijerinckia indica</i> subsp. <i>indica</i> ATCC 9039 (AJ563938) | 97      | 55.0                   | 93.5 | 0.0   | 1.3  |  |
| <i>Bradyrhizobiaceae</i>                                             | 7   | <i>Bradyrhizobium elkanii</i> strain S 127 (DQ485702)                | 94        | Uncultured bacterium clone JSS4-52 (HM750468)                        | 96      | 10.0                   | 0.0  | 7.8   | 15.4 |  |
| <i>Hyphomicrobiaceae</i>                                             | 19  | <i>Rhodomicrobium vannielii</i> ATCC 17100 (NC_014664)               | 86        | Uncultured bacterium clone P1_A05 (GU945902)                         | 91      | 5.0                    | 0.0  | 0.0   | 0.0  |  |
| <i>Xanthobacteraceae</i>                                             | 9   | <i>Azorhizobium caulinodans</i> strain DSM 5975 (AJ563960)           | 92        | Uncultured nitrogen-fixing bacterium clone SB-12 (EU090266)          | 95      | 0.0                    | 0.0  | 6.7   | 3.8  |  |
| <i>Rhodospirillales</i>                                              |     |                                                                      |           |                                                                      |         |                        |      |       |      |  |
| <i>Rhodospirillaceae</i>                                             | 2   | <i>Azospirillum brasilense</i> Sp245 (NC_016617)                     | 95        | Unidentified bacterium <i>nif</i> gene cluster (AF194084)            | 96      | 0.0                    | 0.0  | 3.3   | 1.3  |  |
|                                                                      | 8   | <i>Azospirillum lipoferum</i> strain 4B (FQ311868)                   | 95        | <i>Azospirillum lipoferum</i> strain 4B (FQ311868)                   | 95      | 5.0                    | 0.0  | 1.1   | 9.0  |  |
| <i>Betaproteobacteria</i>                                            |     |                                                                      |           |                                                                      |         |                        |      |       |      |  |
| <i>Burkholderiales</i>                                               |     |                                                                      |           |                                                                      |         |                        |      |       |      |  |
| <i>Burkholderiaceae</i>                                              | 4   | <i>Burkholderia vietnamiensis</i> strain MMi-302 (EF158809)          | 88        | Uncultured bacterium clone Yushu-14 (AY601050)                       | 89      | 0.0                    | 0.0  | 8.9   | 10.3 |  |

|                             |    |                                                            |    |                                                                |    |      |     |      |      |
|-----------------------------|----|------------------------------------------------------------|----|----------------------------------------------------------------|----|------|-----|------|------|
|                             | 5  | <i>Burkholderia tropica</i> strain Aa1<br>(AY313947)       | 96 | Uncultured bacterium clone Yushu-14<br>(AY601050)              | 96 | 15.0 | 1.3 | 17.8 | 10.3 |
| <i>Incertae sedis</i>       | 6  | <i>Leptothrix cholodnii</i> strain SP-6<br>(NC_010524)     | 95 | <i>Leptothrix cholodnii</i> strain SP-6<br>(NC_010524)         | 95 | 0.0  | 0.0 | 0.0  | 1.3  |
| <i>Gammaproteobacteria</i>  |    |                                                            |    |                                                                |    |      |     |      |      |
| <i>Methylococcales</i>      |    |                                                            |    |                                                                |    |      |     |      |      |
| <i>Methylococcaceae</i>     | 11 | <i>Methylovulum miyakonense</i> HT12<br>(NZ_KB913025)      | 92 | Uncultured bacterium clone pCOFnifE11<br>(EU156126)            | 94 | 0.0  | 0.0 | 3.3  | 2.6  |
| <i>Thiotrichales</i>        |    |                                                            |    |                                                                |    |      |     |      |      |
| <i>Thiotrichaceae</i>       | 12 | <i>Thiothrix nivea</i> DSM 5205<br>(NZ_JH651384)           | 87 | Uncultured bacterium clone JSS16-2<br>(HM750519)               | 91 | 0.0  | 0.0 | 2.2  | 1.3  |
| <i>Deltaproteobacteria</i>  |    |                                                            |    |                                                                |    |      |     |      |      |
| <i>Desulfarculales</i>      |    |                                                            |    |                                                                |    |      |     |      |      |
| <i>Desulfarculaceae</i>     | 20 | <i>Desulfarculus baarsii</i> DSM 2075<br>(NC_014365)       | 89 | Uncultured bacterium clone cloC-08<br>(JX268325)               | 99 | 0.0  | 0.0 | 1.1  | 0.0  |
|                             | 22 | <i>Desulfarculus baarsii</i> DSM 2075<br>(NC_014365)       | 83 | Uncultured nitrogen-fixing bacterium<br>clone SB-24 (EU090278) | 94 | 5.0  | 5.2 | 26.7 | 25.6 |
| <i>Desulfovibrionales</i>   |    |                                                            |    |                                                                |    |      |     |      |      |
| <i>Desulfovibrionaceae</i>  | 18 | <i>Desulfovibrio magneticus</i> MBC34<br>(NZ_ALAO01000346) | 88 | Uncultured nitrogen-fixing bacterium<br>clone SB-37 (EU090291) | 96 | 0.0  | 0.0 | 4.4  | 1.3  |
| <i>Syntrophobacterales</i>  |    |                                                            |    |                                                                |    |      |     |      |      |
| <i>Syntrophobacteraceae</i> | 14 | <i>Syntrophobacter fumaroxidans</i> MPOB<br>(NC_008554)    | 93 | Uncultured bacterium clone SN1P1047<br>(JX154753)              | 94 | 0.0  | 0.0 | 1.1  | 1.3  |
| <i>Nitrospirae</i>          |    |                                                            |    |                                                                |    |      |     |      |      |

*Nitrospirales*

*Nitrospiraceae*

|    |                                                               |    |                                                                |    |     |     |     |     |
|----|---------------------------------------------------------------|----|----------------------------------------------------------------|----|-----|-----|-----|-----|
| 1  | <i>Thermodesulfovibrio yellowstonii</i> DSM 11347 (NC_011296) | 93 | ' <i>Bradyrhizobium japonicum</i> ' clone nifH 1-60 (GQ289578) | 95 | 0.0 | 0.0 | 1.1 | 3.8 |
| 10 | <i>Thermodesulfovibrio yellowstonii</i> DSM 11347 (NC_011296) | 87 | ' <i>Bradyrhizobium japonicum</i> ' clone nifH 1-60 (GQ289578) | 94 | 0.0 | 0.0 | 8.9 | 1.3 |

*Chlorobi*

*Chlorobia*

*Chlorobiales*

*Chlorobiaceae*

|    |                                                         |    |                                                             |    |     |     |     |     |
|----|---------------------------------------------------------|----|-------------------------------------------------------------|----|-----|-----|-----|-----|
| 15 | <i>Chloroherpeton thalassium</i> ATCC 35110 (NC_011026) | 91 | <i>Chloroherpeton thalassium</i> ATCC 35110 (NC_011026)     | 91 | 0.0 | 0.0 | 1.1 | 1.3 |
| 16 | <i>Chlorobium phaeovibrioides</i> DSM 265 (NC_009337)   | 89 | Uncultured nitrogen-fixing bacterium clone SB-38 (EU090292) | 98 | 0.0 | 0.0 | 1.1 | 2.6 |

*Spirochaetes*

*Spirochaetales*

*Spirochaetaceae*

|    |                                                   |    |                                                   |    |     |     |     |     |
|----|---------------------------------------------------|----|---------------------------------------------------|----|-----|-----|-----|-----|
| 21 | <i>Treponema azotonutricium</i> ZAS-9 (NC_015577) | 90 | Uncultured bacterium clone pTKY2312_10 (JN217110) | 92 | 0.0 | 0.0 | 1.1 | 0.0 |
|----|---------------------------------------------------|----|---------------------------------------------------|----|-----|-----|-----|-----|

*Verrucomicrobia*

*Opitutae*

*Puniceicoccales*

*Puniceicoccaceae*

|    |                                                          |    |                                                  |    |     |     |     |     |
|----|----------------------------------------------------------|----|--------------------------------------------------|----|-----|-----|-----|-----|
| 13 | <i>Coraliomargarita akajimensis</i> DSM 45221 (CP001998) | 90 | Uncultured bacterium clone JSS4-10 (HM750471)    | 91 | 0.0 | 0.0 | 0.0 | 2.6 |
| 17 | <i>Coraliomargarita akajimensis</i> DSM 45221 (CP001998) | 94 | <i>Opitutaceae</i> bacterium TAV5 (AGJF01000003) | 98 | 5.0 | 0.0 | 2.2 | 3.8 |

---

\* Identity of in silico translated nucleic acid sequences as determined by BLASTX analysis.
